# Supplementary material
Source: Springer Nature journal article supplement (https://www.springermedizin.de/resource/supplementary/12950_2007_73_MOESM5_ESM.pdf/9557902)

**a**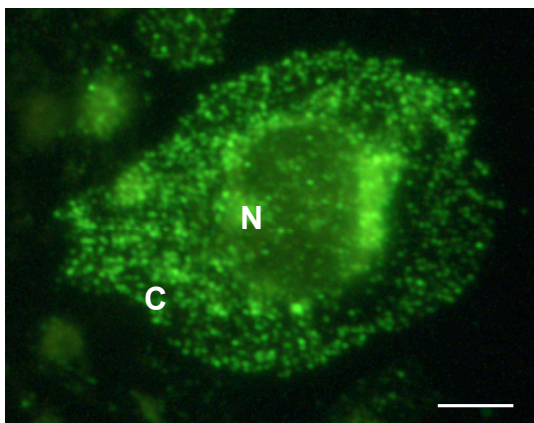**b**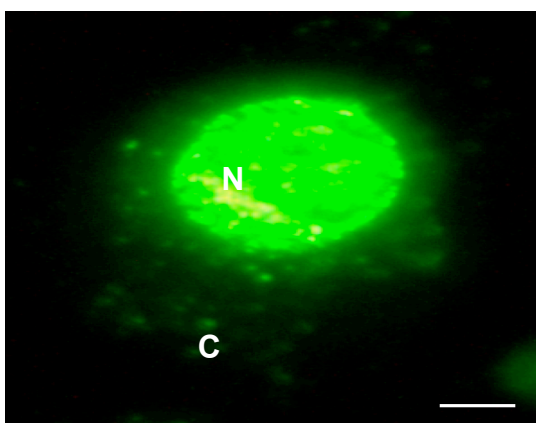**c**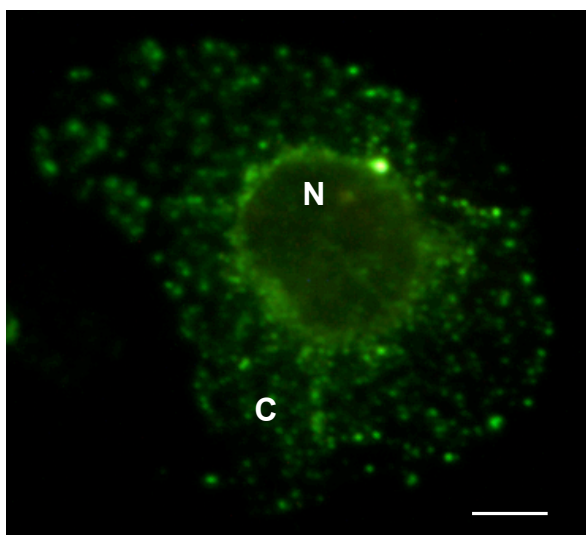**d**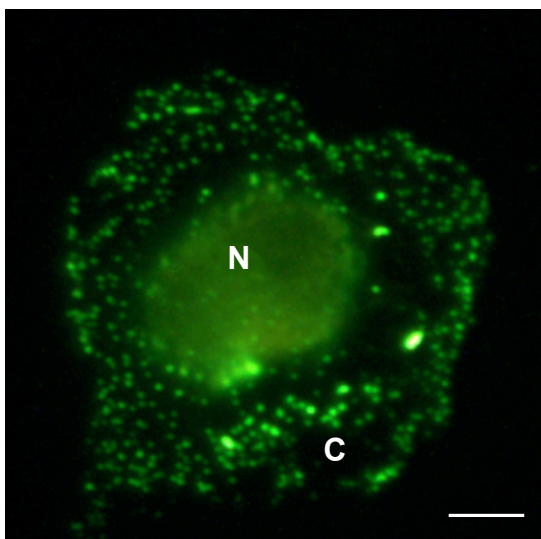**e**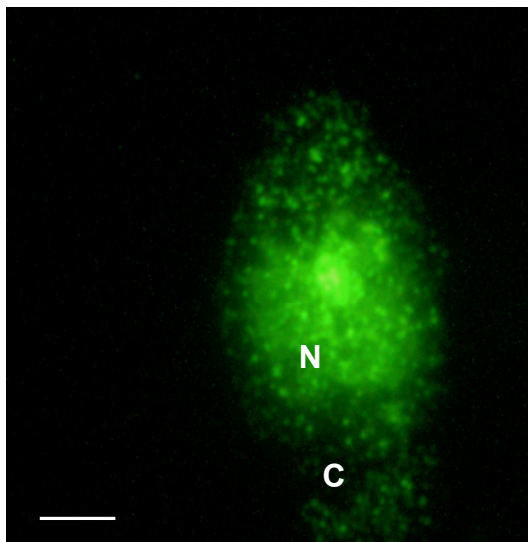

Supplement: MOESM5 [file 9557902]
